# Supplementary material for: Designing Ago2-specific siRNA/shRNA to Avoid Competition with Endogenous miRNAs
Source: PubMed Central journal article supplement (PMC4121517; doi:10.1038/mtna.2014.27), 2014-07-15
Supplement: mtna201427x3.pdf [file mtna201427x3.pdf]

**Supplemental Table 3**

|                          |                                         |
|--------------------------|-----------------------------------------|
| miR RT oligo dT          | GCGAGCACAGAATTAATACGACTCACTATAGGT(20)VN |
| Universal reverse primer | GCGAGCACAGAATTAATACGAC                  |
| miR-150 forward primer   | CTCCCAACCCTTGTACCAG                     |
| miR-451 forward primer   | AACCGTTACCATTACTGAG                     |
